# Supplementary material for: IR cavity ringdown spectroscopy and density functional theory calculation of pyrrole–diethyl ketone clusters: impacts of carbon-chain flexibility on the diversity of N–H⋯OC hydrogen bonds
Source: Royal Society of Chemistry journal article supplement (doi:10.1039/d3cp01466e), 2023-01-01
Supplement: d3cp01466e1.pdf [file d3cp01466e1.pdf]

## Electronic Supplementary Information

### IR cavity ringdown spectroscopy and density functional calculation theory of pyrrole – diethyl ketone clusters: Impacts of carbon-chain flexibility on a diversity of N-H...O=C hydrogen bond

Yoshiteru Matsumoto<sup>a\*</sup> and Kenji Honma<sup>b</sup>

<sup>a</sup> Department of Chemistry, Faculty of Science, Shizuoka University, 836 Ohya, Suruga-ku, Shizuoka, 422-8529, Japan.

<sup>b</sup> Graduate School of Science, University of Hyogo, 3-2-1 Kouto, Kamigori-cho, Ako-gun, Hyogo 678-1297, Japan.

\* Corresponding author: [matsumoto.yoshiteru@shizuoka.ac.jp](mailto:matsumoto.yoshiteru@shizuoka.ac.jp)

S1. Integrated band intensities of the observed NH stretch

S2. Calculated isomeric structures of Py-Dek clusters

S2-1. Py<sub>1</sub>-Dek<sub>1</sub>

S2-2. Comparison with Py<sub>1</sub>-Ac<sub>1</sub> and Py<sub>1</sub>-Cp<sub>1</sub>

S2-3. Py<sub>1</sub>-Dek<sub>2</sub>

S2-4. Py<sub>2</sub>-Dek<sub>1</sub>

S2-5. Comparison with Py<sub>2</sub>-Cp<sub>1</sub>

S3. Calculated vibrational frequency of Py-Dek clusters

S3-1. Py<sub>1</sub>-Dek<sub>1</sub>, Py<sub>1</sub>-Dek<sub>2</sub>, Py<sub>2</sub>-Dek<sub>1</sub>

S3-2. Py<sub>1</sub>-Dek<sub>3</sub> and Py<sub>2</sub>-Dek<sub>2</sub>

S4. NBO analysis of Py<sub>2</sub>-Dek<sub>1</sub> and Py<sub>2</sub>-Cp<sub>1</sub>

## S1. Integrated band intensities of the observed NH stretch

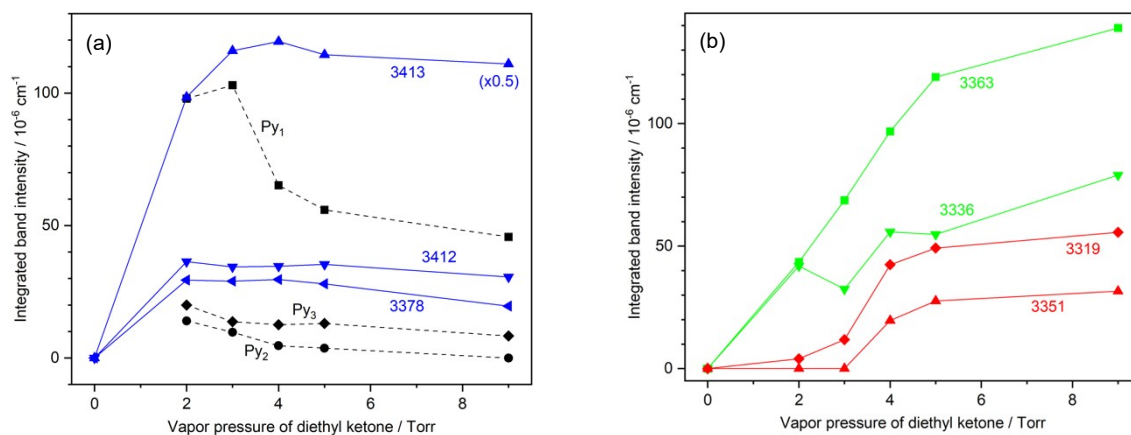

Fig. S1 Integrated band intensities of the NH stretch as a function of the vapor pressure of Dek. (a)  $\text{Py}_1 - \text{Py}_3$ ,  $\text{Py}_1\text{-Dek}_1$  (3413  $\text{cm}^{-1}$ ) and  $\text{Py}_2\text{-Dek}_1$  (3412 and 3378  $\text{cm}^{-1}$ ). (b)  $\text{Py}_1\text{-Dek}_2$  (3363 and 3336  $\text{cm}^{-1}$ ) and higher clusters (3351 and 3319  $\text{cm}^{-1}$ ).

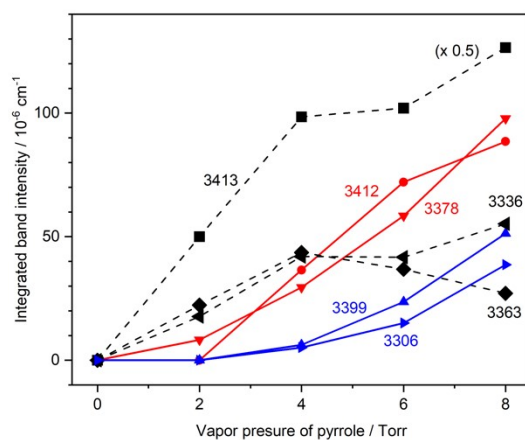

Fig. S2 Integrated band intensities of the NH stretch for Py-Dek clusters as a function of the vapor pressure of pyrrole.

## S2. Calculated isomeric structures of Py-Dek cluster

### S2-1. Py<sub>1</sub>-Dek<sub>1</sub>

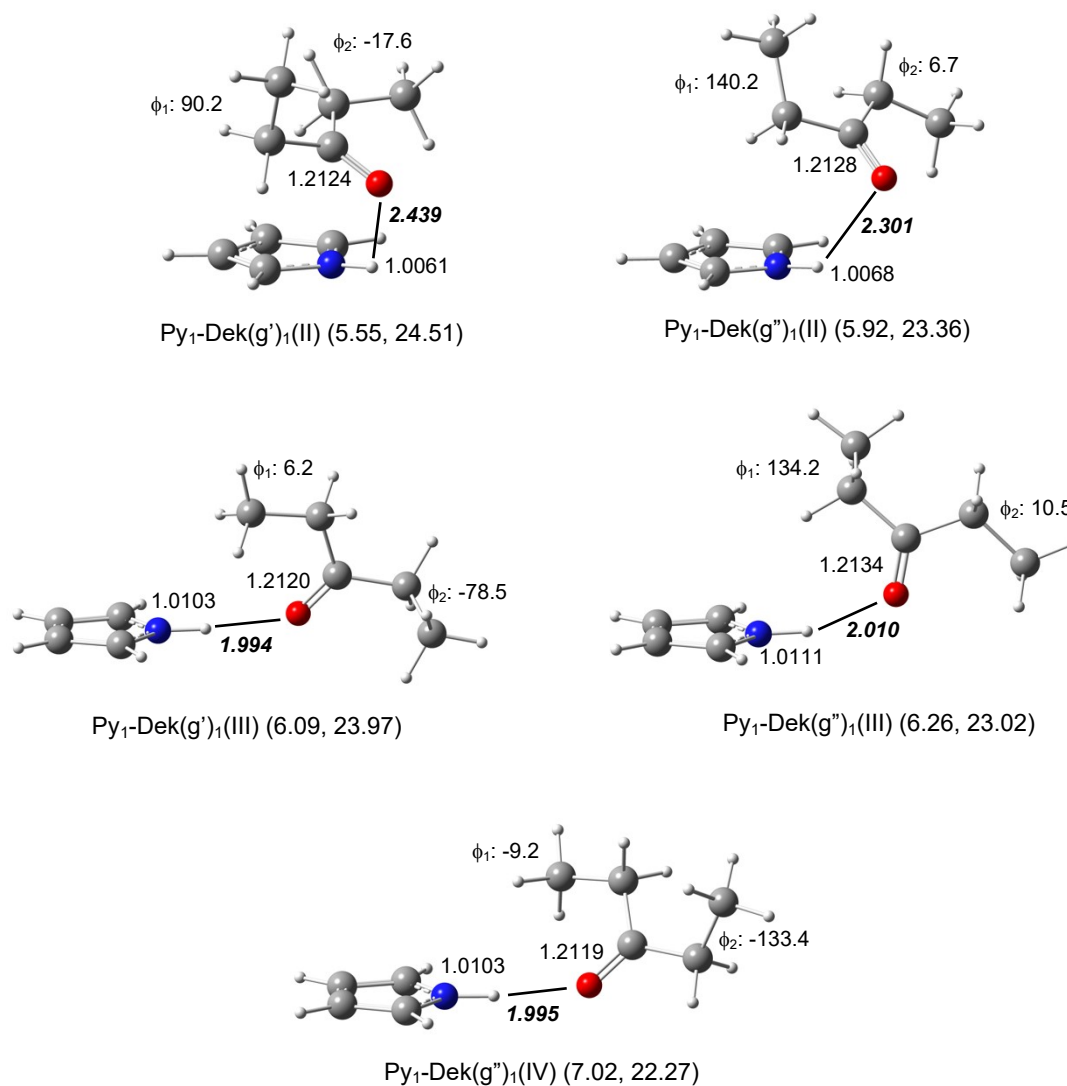

Fig. S3 Higher-energy isomers of Py<sub>1</sub>-Dek<sub>1</sub> calculated at the M05-2X/6-311+G(d,p) level. Isomers are classified by a conformation of Dek, such as anti (a), gauche1 (g') and gauche2 (g''). Roman numbers of I, II... indicate the order of energetic stability in each conformation. Two values in parentheses are the relative and binding energy with a unit of kJ/mol. Geometric parameters of bond lengths (N-H, C=O, and N-H...O) and dihedral angles (C-C-C=O) are inserted with units of Å and degree, respectively.

S2-2. Comparison with  $\text{Py}_1\text{-Ac}_1$  and  $\text{Py}_1\text{-Cp}_1$

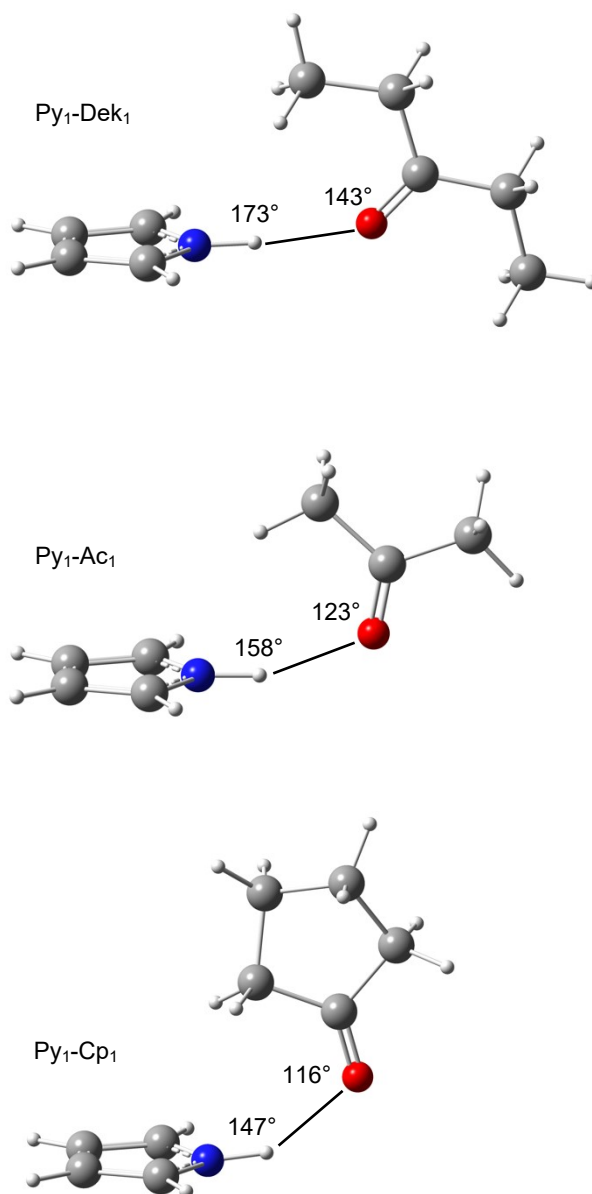

Fig. S4 Optimized N-H...O=C H-bond structures of  $\text{Py}_1\text{-Dek}_1$ ,  $\text{-Ac}_1$ , and  $\text{-Cp}_1$  calculated at the M05-2X/6-311+G(d,p) level. Two values in each structure are the intermolecular angles of N-H...O and H...O=C. At a first glance, the NH and CO groups are quasi-parallel in  $\text{Py}_1\text{-Dek}_1$ , but almost perpendicular in  $\text{Py}_1\text{-Ac}_1$  and  $\text{-Cp}_1$ .

### S2-3. Py<sub>1</sub>-Dek<sub>2</sub>

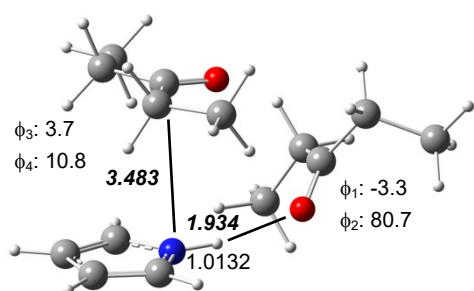

(a) Py<sub>1</sub>-Dek(g'-a)<sub>2</sub>(II) (*6.76*, 63.92)

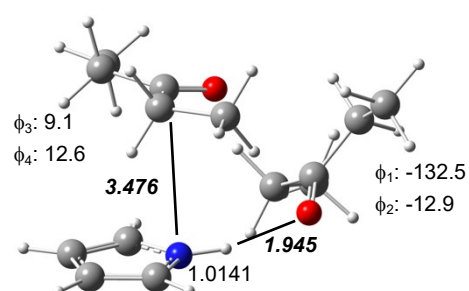

(b) Py<sub>1</sub>-Dek(g''-a)<sub>2</sub>(I) (*7.34*, 62.56)

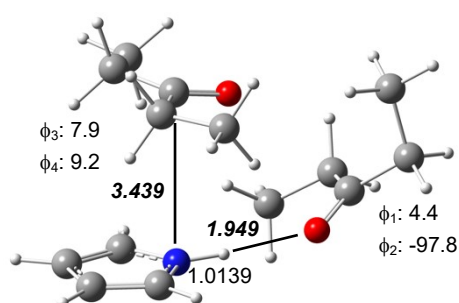

(c) Py<sub>1</sub>-Dek(g'-a)<sub>2</sub>(III) (*8.19*, 62.49)

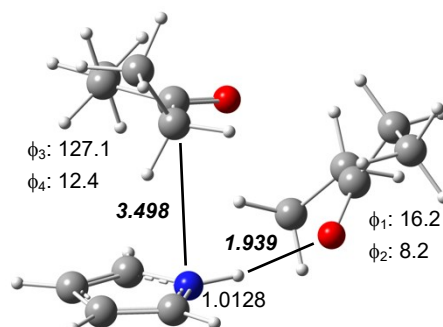

(d) Py<sub>1</sub>-Dek(a-g'')<sub>2</sub>(I) (*8.52*, 61.33)

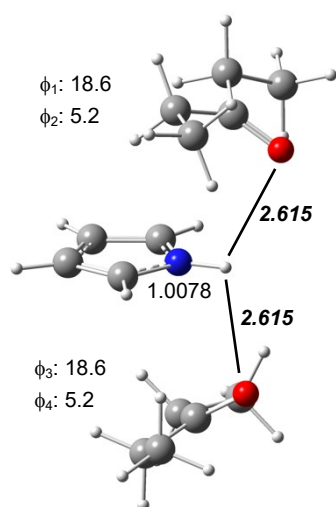

(e) Py<sub>1</sub>-Dek(a-a)<sub>2</sub>(II) (*21.08*, 44.56)

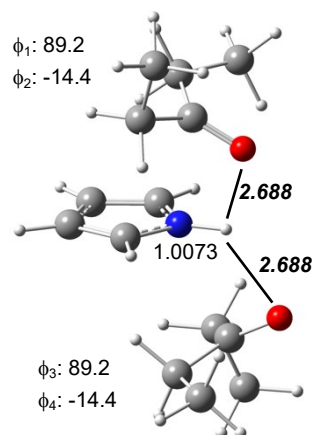

(f) Py<sub>1</sub>-Dek(g'-g')<sub>2</sub>(III) (*31.50*, 44.23)

Fig. S5 Six isomeric structures of Py<sub>1</sub>-Dek<sub>2</sub> with higher energy calculated at the M05-2X/6-311+G(d,p) level. Isomeric structures are classified by a combination of Dek conformation, such as Dek(a-a). Roman numbers of I, II and so on, indicate the order of energetic stability in each conformation. Two values in parentheses are the relative energy (*italic*) and the binding energy (*roman*) with a unit of kJ/mol. Geometric parameters of bond lengths (N-H, C=O, N-H...O, and C...N) and dihedral angles (C-C-C=O) are inserted with units of Å and degree, respectively.

S2-4. Py<sub>2</sub>-Dek<sub>1</sub>

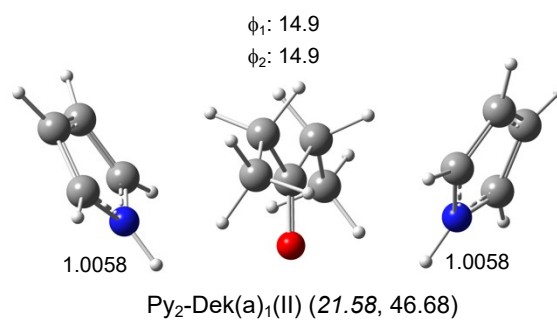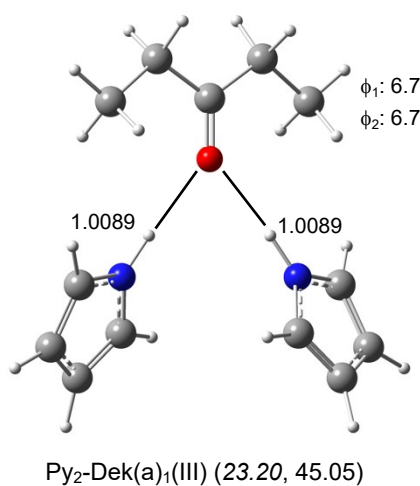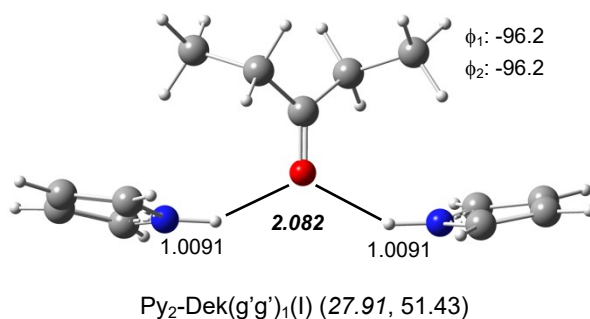

Fig. S6 Three isomeric structures of Py<sub>2</sub>-Dek<sub>1</sub> with higher energy calculated at the M05-2X/6-311+G(d,p) level. Isomeric structures are classified by a conformation of Dek, such as anti (a), gauche1 (g') and gauche2 (g''). Roman numbers of I, II and so on, indicate the order of energetic stability in each conformation. Two values in parentheses are the relative energy (*italic*) and the binding energy (roman) with a unit of kJ/mol. Geometric parameters of bond lengths (N-H and N-H...O) and dihedral angles (C-C-C=O) are inserted with units of Å and degree, respectively.

## S2-5. Comparison with $\text{Py}_2\text{-Cp}_1$

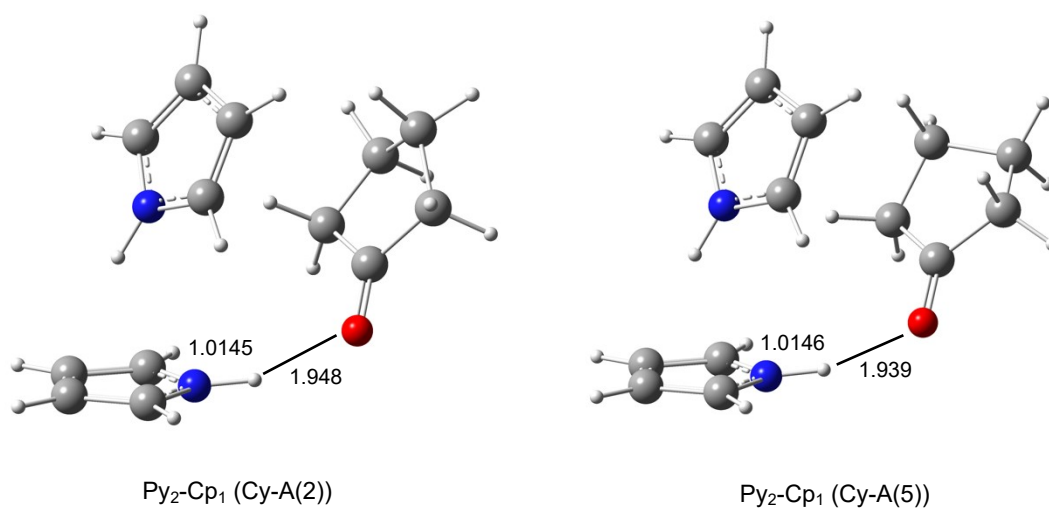

Fig. S7 Optimized cyclic structures of  $\text{Py}_2\text{-Cp}_1$  calculated at the M05-2X/6-311+G(d,p) level. Geometric parameters of the NH bond lengths and NH...O intermolecular distances are inserted with units of Å. The notations of Cy-A(2) and Cy-A(5) are taken from the reference “Y. Matsumoto and K. Honma, IR cavity ringdown spectroscopy and density functional theory for jet-cooled pyrrole-cyclopentanone binary clusters: Effect of pseudorotation on N-H...O=C hydrogen bonds, *J. Phys. Chem. A*, 2020, **124**, 2436–2448.”

S3. Calculated vibrational frequency of Py-Dek clusters

S3-1. Py<sub>1</sub>-Dek<sub>1</sub>, Py<sub>1</sub>-Dek<sub>2</sub>, Py<sub>2</sub>-Dek<sub>1</sub>

Table S1 Calculated NH stretches of Py-Dek clusters, performed at the M05-2X/6-311+G(d,p) level. The scaling factor for anharmonicity correction is 0.9393. Units of relative energy, binding energy, frequency, and IR intensity are kJ/mol, kJ/mol, cm<sup>-1</sup>, and km/mol, respectively.

|                                       | <i>Relative energy</i> | <i>Binding energy</i> | <i>Calculated frequency (IR intensity)</i> | <i>Assignment</i> | <i>Structure</i>                                  |
|---------------------------------------|------------------------|-----------------------|--------------------------------------------|-------------------|---------------------------------------------------|
| <i>Py<sub>1</sub>-Dek<sub>1</sub></i> | 0.00                   | 25.01                 | 3478 (118)                                 | <i>Free</i>       | <i>Py<sub>1</sub>-Dek(a)<sub>1</sub> (I)</i>      |
|                                       | 0.40                   | 25.01                 | 3412 (637)                                 | <i>HB (O=C)</i>   | <i>Py<sub>1</sub>-Dek(a)<sub>1</sub> (II)</i>     |
|                                       | 2.88                   | 27.18                 | 3393 (395)                                 | <i>HB (O=C)</i>   | <i>Py<sub>1</sub>-Dek(g')<sub>1</sub> (I)</i>     |
|                                       | 3.41                   | 25.87                 | 3451 (166)                                 | <i>Quasi-free</i> | <i>Py<sub>1</sub>-Dek(g'')<sub>1</sub> (I)</i>    |
|                                       | 5.55                   | 24.51                 | 3485 (112)                                 | <i>Free</i>       | <i>Py<sub>1</sub>-Dek(g')<sub>1</sub> (II)</i>    |
|                                       | 5.92                   | 23.36                 | 3472 (136)                                 | <i>Free</i>       | <i>Py<sub>1</sub>-Dek(g'')<sub>1</sub> (II)</i>   |
|                                       | 6.09                   | 23.97                 | 3405 (642)                                 | <i>HB (O=C)</i>   | <i>Py<sub>1</sub>-Dek(g')<sub>1</sub> (III)</i>   |
|                                       | 6.26                   | 23.02                 | 3388 (561)                                 | <i>HB (O=C)</i>   | <i>Py<sub>1</sub>-Dek(g'')<sub>1</sub> (III)</i>  |
|                                       | 7.02                   | 22.27                 | 3400 (651)                                 | <i>HB (O=C)</i>   | <i>Py<sub>1</sub>-Dek(g'')<sub>1</sub> (IV)</i>   |
| <i>Py<sub>1</sub>-Dek<sub>2</sub></i> | 0.00                   | 65.63                 | 3361 (564)                                 | <i>HB (O=C)</i>   | <i>Py<sub>1</sub>-Dek(a-a)<sub>2</sub> (I)</i>    |
|                                       | 5.13                   | 65.55                 | 3351 (587)                                 | <i>HB (O=C)</i>   | <i>Py<sub>1</sub>-Dek(a-g')<sub>2</sub> (I)</i>   |
|                                       | 6.38                   | 64.30                 | 3335 (632)                                 | <i>HB (O=C)</i>   | <i>Py<sub>1</sub>-Dek(g'-a)<sub>2</sub> (I)</i>   |
|                                       | 6.76                   | 63.92                 | 3349 (620)                                 | <i>HB (O=C)</i>   | <i>Py<sub>1</sub>-Dek(g'-a)<sub>2</sub> (II)</i>  |
|                                       | 7.34                   | 62.56                 | 3332 (626)                                 | <i>HB (O=C)</i>   | <i>Py<sub>1</sub>-Dek(g''-a)<sub>2</sub> (I)</i>  |
|                                       | 8.19                   | 62.49                 | 3334 (656)                                 | <i>HB (O=C)</i>   | <i>Py<sub>1</sub>-Dek(g'-a)<sub>2</sub> (III)</i> |
|                                       | 8.52                   | 61.33                 | 3349 (598)                                 | <i>HB (O=C)</i>   | <i>Py<sub>1</sub>-Dek(a-g'')<sub>2</sub> (I)</i>  |
|                                       | 21.08                  | 44.56                 | 3464 (113)                                 | <i>Free</i>       | <i>Py<sub>1</sub>-Dek(a-a)<sub>2</sub> (II)</i>   |
|                                       | 31.50                  | 44.23                 | 3474 (97)                                  | <i>Free</i>       | <i>Py<sub>1</sub>-Dek(g'-g')<sub>2</sub> (I)</i>  |
| <i>Py<sub>2</sub>-Dek<sub>1</sub></i> | 0.00                   | 68.26                 | 3386 (365)                                 | <i>HB (O=C)</i>   | <i>Py<sub>1</sub>-Dek(a)<sub>1</sub> (I)</i>      |
|                                       |                        |                       | 3421 (440)                                 | <i>HB (π)</i>     |                                                   |
|                                       | 5.93                   | 66.60                 | 3309 (565)                                 | <i>HB (O=C)</i>   | <i>Py<sub>1</sub>-Dek(g'')<sub>1</sub> (I)</i>    |
|                                       |                        |                       | 3414 (406)                                 | <i>HB (π)</i>     |                                                   |
|                                       | 21.58                  | 46.68                 | 3485 (90)                                  | <i>Free</i>       | <i>Py<sub>1</sub>-Dek(a)<sub>1</sub> (II)</i>     |
|                                       |                        |                       | 3486 (116)                                 | <i>Free</i>       |                                                   |
|                                       | 23.20                  | 45.05                 | 3415 (276)                                 | <i>HB (O=C)</i>   | <i>Py<sub>1</sub>-Dek(a)<sub>1</sub> (III)</i>    |
|                                       |                        |                       | 3428 (723)                                 | <i>HB (O=C)</i>   |                                                   |
|                                       | 27.91                  | 51.43                 | 3415 (719)                                 | <i>HB (O=C)</i>   | <i>Py<sub>1</sub>-Dek(g'g')<sub>1</sub> (I)</i>   |
|                                       |                        |                       | 3422 (28)                                  | <i>HB (O=C)</i>   |                                                   |



S3-2. Py<sub>1</sub>-Dek<sub>3</sub> and Py<sub>2</sub>-Dek<sub>2</sub>

Table S2 Calculated NH stretches of Py<sub>1</sub>-Dek<sub>3</sub> and Py<sub>2</sub>-Dek<sub>2</sub> hetero-tetramers at the M05-2X/6-311+G(d,p) level. The scaling factor used is 0.9393. Units of frequency and IR intensity are cm<sup>-1</sup> and km/mol, respectively.

|                                          |                                               | <i>Frequency</i> | <i>IR intensity</i> | <i>Assignment</i> |
|------------------------------------------|-----------------------------------------------|------------------|---------------------|-------------------|
| <i>Py<sub>1</sub>-Dek<sub>3</sub></i>    | <i>Py<sub>1</sub>-Dek(a-a-a)<sub>3</sub></i>  | 3344             | 523                 | <i>N-H...O=C</i>  |
|                                          | <i>Py<sub>1</sub>-Dek(g'-a-a)<sub>3</sub></i> | 3264             | 665                 | <i>N-H...O=C</i>  |
|                                          | <i>Py<sub>1</sub>-Dek(a-g'-a)<sub>3</sub></i> | 3321             | 564                 | <i>N-H...O=C</i>  |
| <i>Py<sub>2</sub>-Dek(a)<sub>2</sub></i> | <i>(I)</i>                                    | 3312             | 1                   | <i>Sym.</i>       |
|                                          |                                               | 3317             | 1585                | <i>Asym.</i>      |
|                                          | <i>(II)</i>                                   | 3363             | 423                 | <i>N-H...π</i>    |
|                                          |                                               | 3408             | 362                 | <i>N-H...O=C</i>  |
|                                          | <i>(III)</i>                                  | 3361             | 409                 | <i>N-H...π</i>    |
|                                          |                                               | 3430             | 434                 | <i>N-H...O=C</i>  |

S4. NBO analysis of Py<sub>2</sub>-Dek<sub>1</sub> and Py<sub>2</sub>-Cp<sub>1</sub>

Table S3 The 2<sup>nd</sup> order perturbative energy ( $E^{(2)}$  in kJ/mol) due to charge transfer interactions calculated by natural bond orbital (NBO) analysis for Py<sub>2</sub>-Dek<sub>1</sub> and Py<sub>2</sub>-Cp<sub>1</sub>. The calculation is performed at the M05-2X/6-311+G(d,p) level.

|                                                   | <i>Py<sub>2</sub>-Dek(a)<sub>1</sub> (I)</i> | <i>Py<sub>2</sub>-Dek(g'')<sub>1</sub> (I)</i> | <i>Py<sub>2</sub>-Cp<sub>1</sub> (Cy-A(2))</i> | <i>Py<sub>2</sub>-Cp<sub>1</sub> (Cy-A(5))</i> |
|---------------------------------------------------|----------------------------------------------|------------------------------------------------|------------------------------------------------|------------------------------------------------|
| $n_O \rightarrow \sigma_{NH}^*$ <sup>a</sup>      | 27.1                                         | 38.7                                           | 41.3                                           | 44.0                                           |
| $\pi_{CO} \rightarrow \sigma_{NH}^*$ <sup>a</sup> | 2.55                                         | 2.51                                           | 0.96                                           | 0.50                                           |
| $\pi_{CC} \rightarrow \sigma_{NH}^*$ <sup>b</sup> | 10.9                                         | 10.7                                           | 11.0                                           | 11.4                                           |

<sup>a</sup> N-H...O=C H-bond

<sup>b</sup> N-H... $\pi$  H-bond
